# Supplementary material for: Cross-Study Homogeneity of Psoriasis Gene Expression in Skin across a Large Expression Range
Source: PLoS One. 2013 Jan 4;8(1):e52242. doi: 10.1371/journal.pone.0052242 (PMC3537625; doi:10.1371/journal.pone.0052242)
Supplement: Supplemental Table 1 — Taqman assays and microarray sequence codes for Taqman-microarray comparisons. (XLSX) [file pone.0052242.s001.xlsx]

## Sheet: Sheet1
Gene	Assay ID	Microarray Sequence Code
CAMP	Hs00189038_m1	210244_at
CCL22	Hs00171080_m1	207861_at
CCL5	Hs00174575_m1	1555759_a_at
CCL8	Hs00271615_m1	214038_at
CD3G	Hs00962186_m1	206804_at
CHRM3	Hs00265216_s1	214596_at
CRAT	Hs00912963_m1	209522_s_at
CXCL6	Hs00237017_m1	206336_at
FOXP3	Hs01085834_m1	221334_s_at
ICOS	Hs00359999_m1	210439_at
IDO1	Hs00984148_m1	210029_at
IFNg	Hs00989291_m1	210354_at
IL12B	Hs01011518_m1	207901_at
IL13	Hs00174379_m1	207844_at
IL17A	Hs00174383_m1	216876_s_at
IL17F	Hs00369400_m1	234408_at
IL19	Hs00604657_m1	220745_at
IL1F6	Hs00205367_m1	221404_at
IL1F9	Hs00219742_m1	220322_at
IL20	Hs00218888_m1	224071_at
IL22	Hs01574154_m1	222974_at
IL23A	Hs00372324_m1	220054_at
IL26	Hs00218189_m1	221111_at
IL7R	Hs00902334_m1	205798_at
KRT16	Hs00373910_g1	209800_at
S100A8	Hs00374264_g1	202917_s_at
TNF	Hs00174128_m1	207113_s_at
TNFRSF11A	Hs00187192_m1	207037_at
TNFRSF11B	Hs00171068_m1	204933_s_at
TNFSF11	Hs00243522_m1	211153_s_at
VNN3	Hs01125163_g1	220528_at
